# Supplementary material for: Short-term animal product dietary restriction alters metabolic profiles and modulates immune function
Source: Research Square preprint supplement (doi:10.21203/rs.3.rs-7075476/v1), 2025-07-15
Supplement: Supplementary file 1 [file 83a2386fc4eacb075e069532.docx]

**Supplementary Information for:**

**Short-term animal product dietary restriction alters metabolic profiles and modulates immune function**

Eleni M. Loizidou1,2#, Aikaterini Palaiokrassa1#, Samuel Assiedu3#,Alexandros Simistiras1, Petros Barmpounakis4, Stavros Glentis1,5, Maria Anezaki1, Kristina V. Bergersen3, Iosif Chatzimichalis1, Eleni Kotsanopoulou1, Ioannis Kontoyiannis6, Nikolaos Demiris4, Pavlos Rouskas7, Nikolaos Scarmeas8,9, Mary Yannakoulia10, Mihalis Verykokakis11, Meera G. Nair 3, Konstantinos Rouskas1,12,Antigone S. Dimas1*

1 Institute for Bioinnovation, Biomedical Sciences Research Center 'Alexander Fleming', Fleming 34, 16672, Vari, Greece

2 Bioinformatics Department, The Cyprus Institute of Neurology and Genetics, 6 Iroon Avenue, P.C. 2371, Ayios Dometios, Nicosia, Cyprus

3 Division of Biomedical Sciences, University of California Riverside, Riverside, CA 92521, U.S.A.

4 Department of Statistics, Athens University of Economics and Business, Athens, Greece

5 Pediatric Hematology/Oncology Unit (POHemU), First Department of Pediatrics, University of Athens, Aghia Sophia Children's Hospital, Levadias 8, 11527, Athens, Greece

6 Statistical Laboratory, Centre for Mathematical Sciences, University of Cambridge, United Kingdom

71st Department of Cardiology, AHEPA University Hospital, Aristotle University, Thessaloniki, Greece

8 Department of Neurology, Columbia University, New York, NY, USA

9 1st Department of Neurology, Medical School, National and Kapodistrian University of Athens

10 Department of Nutrition and Dietetics, Harokopio University, Athens, Greece

11 Institute for Fundamental Biomedical Research, Biomedical Sciences Research Center 'Alexander Fleming', Fleming 34, 16672, Vari, Greece

12 Institute of Applied Biosciences, Centre for Research & Technology Hellas, Thessaloniki, Greece

# Equal contribution

*Corresponding author:

Telephone: +30 210 9656310

Email address: [dimas@fleming.gr](mailto:dimas@fleming.gr)

**Supplementary Notes**

**Supplementary Note 1. Inclusion and exclusion criteria for FastBio study**

Inclusion criteria:

- Healthy female and male individuals 18 – 75 years of age at the time of enrolment. One participant turned 76 between time of enrolment and first sampling time point (T1).
- Able to provide signed and dated informed consent. Willing to provide blood samples.
- Individuals who had followed periodic dietary restriction of animal products for at least ten years (for the PR group).
- Individuals who do not follow any kind of specific diet including veganism, vegetarianism, caloric restriction, intermittent fasting etc. (for the NR group).

Exclusion criteria:

- Use of antibiotic, antifungal, antiviral or antiparasitic drugs six months prior to T1.
- Acute disease, defined as the presence of a moderate or severe illness with or without fever, at sampling time points.
- Alcohol or drug abuse two years prior to T1.
- Participants who normally practice periodic restriction from animal products, but had to alter their diet for a specific reason (e.g. pregnancy).

**Supplementary Note 2. Dietary pattern of periodic animal product restriction as specified by the Greek Orthodox Church**

Individuals following the dietary regimen of the Greek Orthodox Church practice restriction of animal products by abstaining from meat, fish, dairy products and eggs for 180-200 days annually. Consumption of shellfish and molluscs is permitted on all days of restriction. Furthermore, during periods of restriction, practicing individuals typically consume less alcohol. Animal product restriction is practiced on Wednesdays and Fridays throughout the year (excluding the week immediately after Christmas, Easter and the Pentecost) and over four extended periods annually:

- 40 days before Christmas (abstinence from meat, dairy product and eggs, consumption of fish is permitted except on Wednesdays and Fridays).
- 48 days before Easter (Lent; abstinence from meat, fish, dairy products and eggs, consumption of fish is permitted only on March 25th and on Palm Sunday).
- 0-30 days in June (abstinence from meat, dairy products and eggs, consumption of fish is permitted).
- 15 days before August 15th (Assumption; abstinence from meat, fish, dairy products and eggs, consumption of fish is permitted only on August 6th).

**Supplementary Note 3. HOMA indices**

Prior to calculating HOMA indices, we inspected our data for glucose levels < 2.5mmol/L. No individuals were excluded based on this threshold. We calculated HOMA indices as follows 1,2.

**Supplementary Note 4: Statistical adjustments and handling of missing data**

For biomarker and CBC data, lme models were adjusted for sex, age, BMI (fixed confounders) (**Supplementary Table** **7**), an interaction term between dietary group (PR or NR) and time point (T1 or T2) to conduct comparisons, and medication use to account for effects on measured traits. Participants were grouped into four age categories based on representative classifications in the literature 3-5:19-40, 41-50, 51-60 and 61-76 years old and four BMI categories as indicated by the World Health Organization (WHO) 6: < 18.5kg/m2 underweight; 18.5 kg/m2 ≤ BMI < 25 kg/m2 normal weight; 25 kg/m2 ≤ BMI < 30 kg/m2, overweight; and ≥ 30 kg/m2 obese. Medication types accounted for included drugs for blood lipids, blood pressure, blood glucose levels, osteoporosis, thyroid function, and anticoagulants. All models were run with: (a) medication use as a single, binary covariate (Yes/No), and (b) each medication type as a separate covariate with no differences in overall findings. We report estimates and CIs from the (b) approach. When exploring effects of dietary restriction of animal products on anthropometric traits (weight and BMI), the same models were run without adjustments for BMI. For effects on blood pressure traits (SBP and DBP), in addition to the clinical chemistry measurements model adjustments, we also accounted for smoking status, which is a known risk factor for hypertension 7. Participants were defined as smokers and non-smokers (with past smokers and e-cigarette users also considered as non-smokers) based on NHS guidelines (<https://www.nhs.uk/live-well/quit-smoking/using-e-cigarettes-to-stop-smoking/>). In addition to the model adjustments described above, we also adjusted for smoking and alcohol consumption with no impact on results. Self-reported levels of physical activity, which did not differ substantially between dietary groups at each time point and for each dietary group within time points, were not included in the models. We excluded eight PR and 13 NR individuals from the complete sample (N = 411) because they were not present at T2. Findings are therefore from 200 PR and 211 NR individuals at T1 and 192 PR and 198 NR individuals at T2 (paired analysis: N = 390).

**Supplementary Note 5. Self-reported use of dietary supplements**

Self-reported use of dietary supplements for FastBio participants was as follows:

PR group: Mg (N=1), Fe (N=2), Vitamin B (N=1) Calcium (N=3), Vitamin B and Calcium (N=1), Vitamin D (N=1), amino acid supplement (N=1)

NR group: Calcium (N=1), Vitamin D (N=1)

**Supplementary Tables**

**Supplementary Table 1. Sociodemographic traits and geographic origin of study participants** a

|  | **Total (N=411)** | **PR (N=200)** | **NR (N=211)** | ***P*-value** |
| --- | --- | --- | --- | --- |
| Sex |  |  |  |  |
| *Female* | 224 (54.5) | 108 (54) | 116 (55) | 0.8425 |
| *Male* | 187 (45.5) | 92 (46) | 95 (45) |
| Age (yrs) | 48.1 ± 13.6 | 51.5 ± 13.5 | 45.0 ± 13.1 | <0.00001 |
| BMI (Kg/m2) | 27.3 ± 4.6 | 28.4 ± 4.6 | 26.2 ± 4.4 | <0.00001 |
| Blood Pressure (mmHg) |  |  |  |  |
| *Systolic BP (SBP)* | 124 ± 19.4 | 127 ± 19.0 | 121 ± 19.7 | 0.003 |
| *Diastolic BP (DBP)* | 79 ± 11.3 | 80 ± 10.8 | 78 ± 11.8 | 0.04 |
| Education |  |  |  |  |
| *Tertiary* | 293 (71.3) | 134 (67) | 159 (75.4) | 0.0612 |
| *Primary and Secondary* | 118 (28.7) | 66 (33) | 52 (24.6) |
| Marital status |  |  |  |  |
| *Married* | 286 (69.6) | 147 (73.5) | 139 (65.9) | 0.0931 |
| *Unmarried* | 125 (30.4) | 53 (26.5) | 72 (34.1) |  |
| Smoking (Y/N) |  |  |  |  |
| *Non-smokers* | 328 (79.8) | 187 (93.5) | 141 (66.8) | <0.00001 |
| *Smokers* | 83 (20.2) | 13 (6.5) | 70 (33.2) |
| Parental origin |  |  |  |  |
| *Northern Greece* | 275 (66.9) | 137 (68.5) | 138 (65.4) | 0.0979 |
| *Central or Southern Greece* | 32 (7.8) | 11 (5.5) | 21 (9.9) |

a Continuous variables were expressed as mean ± standard deviations and categorical variables as N(%).
Abbreviations: BMI body mass index, SBP systolic blood pressure, DBP diastolic blood pressure.

**Supplementary Table 2. Sociodemographic traits of participants with PBMCs a**

|  | **PR (N=28)** | **NR (N=19)** | ***P*-value** |
| --- | --- | --- | --- |
| **Age (years)** | 51.5 ± 13.8 | 50.1 ± 12.8 | 0.72 |
| **Sex (female %)** | 14 (50) | 6 (31.6) | 0.34 |
| **BMI (kg/m2)** | 28.9 ± 5.5 | 28.2 ± 4.7 | 0.89 |
| **Smoking status (Yes %)** | 2 (7.1) | 2 (10.5) | 1.00 |
| **Blood pressure (mmHg)** |  |  |  |
| **SBP** | 127 ± 14.8 | 129 ± 24.1 | 0.72 |
| **DBP** | 82 ± 11.4 | 80 ± 12.7 | 0.72 |

a Continuous variables were expressed as mean ± standard deviations and categorical variables as N(%).

Abbreviations: BMI body mass index, SBP systolic blood pressure, DBP diastolic blood pressure.

**Supplementary Table 3. Biomarker and complete blood count traits in PR and NR dietary groups at two time points.**

| **Measured Traits** | **Mean ± sd** | | | | **Units** | **Normal Rangeǂ** |
| --- | --- | --- | --- | --- | --- | --- |
| **Blood biomarkers** | **T1** | | **T2** | |  |  |
| PR(n=200) | NR(n=211) | PR(n=192) | NR(n=198) |
| Total cholesterol | 5.1 ± 0.9 | 4.9 ± 0.8 | 4.7 ± 0.9 | 5.0 ± 0.9 | mmol/l | < 5.2 |
| LDL cholesterol | 3.4 ± 0.8 | 3.3 ± 0.8 | 3.1 ± 0.8 | 3.3 ± 0.9 | mmol/l | < 3.4 |
| HDL cholesterol | 1.6 ± 0.4 | 1.6 ± 0.4 | 1.5 ± 0.4 | 1.5 ± 0.4 | mmol/l | 0.9 - 1.6 |
| Triglycerides | 2.7 ± 1.3 | 2.5 ± 1.4 | 2.8 ± 1.3 | 2.6 ± 1.2 | mmol/l | < 3.9 |
| Glucose | 2.5 ± 0.3 | 2.4 ± 0.3 | 2.5 ± 0.3 | 2.5 ± 0.3 | mmol/l | 1.9 - 3.0 |
| Insulin | 9.8 ± 9.0 | 9.4 ± 13.4 | 10.4 ± 11.0 | 9.4 ± 9.3 | mU/L | 3.0 - 25.0 |
| HbA1c | 5.3 ± 0.5 | 5.2 ± 0.5 | 5.3 ± 0.4 | 5.2 ± 0.5 | % | 4.5 - 6.2 |
| Urea | 32.0 ± 9.1 | 30.0 ± 7.8 | 26.0 ± 7.3 | 30.0 ± 7.4 | mg/dl | 10 - 50 |
| Uric acid | 5.1 ± 1.3 | 4.8 ± 1.3 | 5.0 ± 1.2 | 4.8 ± 1.3 | mg/dl | 2.4 - 5.7 |
| Creatinine | 0.8 ± 0.2 | 0.8 ± 0.2 | 0.7 ± 0.2 | 0.8 ± 0.1 | mg/dl | 0.5 - 0.9 |
| AST | 19.1 ± 7.7 | 18.5 ± 6.0 | 20.0 ± 7.0 | 18.7 ± 4.9 | U/I | 10 - 32 |
| ALT | 20.8 ± 12.5 | 20.5 ± 12.2 | 19.1 ± 11.5 | 19.4 ± 9.0 | U/I | 10 - 33 |
| γ-GT | 19.3 ± 15.9 | 18.8 ± 17.3 | 16.1 ± 11.0 | 17.4 ± 15.9 | U/I | 5 - 36 |
| ALP | 66.0 ± 17.3 | 60.0 ± 16.4 | 68.0 ± 17.0 | 60.0 ± 15.8 | U/I | 35 - 104 |
| TSH | 2.0 ± 1.3 | 1.8 ± 1.0 | 2.0 ± 1.1 | 1.9 ± 1.1 | mIU/L | 0.4 - 4.9 |
| CRP | 2.6 ± 2.7 | 2.2 ± 2.4 | 2.2 ± 2.3 | 2.4 ± 3.6 | mg/L | 0 - 5 |
| **HOMA** |  |  |  |  |  |  |
| HOMA-B | 107.6 ± 71.8 | 106.6 ± 88.9 | 117.3 ± 112.9 | 104.3 ± 85.5 | --- | --- |
| HOMA-IR | 2.4 ± 2.6 | 2.4 ± 4.7 | 2.5 ± 2.9 | 2.3 ± 2.4 | --- | --- |
| **CBC** |  |  |  |  |  |  |
| WBC | 6.1 ± 1.5 | 6.4 ± 1.7 | 5.7 ± 1.4 | 6.1 ± 1.6 | K/μl | 4.0 - 11.0 |
| Lymphocytes | 2.0 ± 0.6 | 2.0 ± 0.6 | 1.9 ± 0.6 | 2.0 ± 0.6 | x10³/μl | 1.5 - 4.0 |
| Lymphocyte % | 33.0 ± 6.5 | 32.0 ± 7.1 | 34.0 ± 7.1 | 33.0 ± 7.5 | % | 20 - 40 |
| Eosinophils | 0.2 ± 0.1 | 0.2 ± 0.2 | 0.2 ± 0.1 | 0.2 ± 0.1 | x10³/μl | < 0.4 |
| Eosonophil % | 2.5 ± 1.6 | 3.1 ± 2.3 | 2.8 ± 2.1 | 3.1 ± 2.1 | % | 1 - 6 |
| Monocytes | 0.4 ± 0.1 | 0.4 ± 0.1 | 0.4 ± 0.1 | 0.4 ± 0.1 | x10³/μl | 0.1 - 0.9 |
| Monocyte % | 6.7 ± 1.7 | 6.8 ± 1.7 | 7.5 ± 1.7 | 7.3 ± 1.6 | % | 2 - 10 |
| Basophils | 0.003 ± 0.02 | 0.003 ± 0.02 | 0.003 ± 0.02 | 0.003 ± 0.02 | x10³/μl | < 0.1 |
| Basophil % | 0.03 ± 0.2 | 0.04 ± 0.2 | 0.04 ± 0.2 | 0.03 ± 0.2 | % | 0.3 - 1.0 |
| Neutrophils | 3.6 ± 1.1 | 3.8 ± 1.3 | 3.2 ± 1.0 | 3.5 ± 1.2 | x10³/μl | 2.0 - 7.7 |
| Neutrophil % | 58.1 ± 6.9 | 58.5 ± 7.7 | 55.5 ± 7.7 | 56.3 ± 8.1 | % | 40 - 75 |
| RBC | 4.9 ± 0.5 | 4.9 ± 0.5 | 4.9 ± 0.5 | 5.0 ± 0.5 | Μ/ml | 3.8 - 5.8 |
| Hemoglobin | 14.2 ± 1.4 | 14.2 ± 1.5 | 14.0 ± 1.3 | 14.1 ± 1.4 | g/dl | 11.5 - 16.5 |
| Hematocrit | 42.6 ± 3.5 | 42.3 ± 3.6 | 42.2 ± 3.4 | 42.4 ± 3.5 | % | 37 - 47 |
| MCH | 29.3 ± 2.4 | 29.1 ± 3.0 | 28.8 ± 2.4 | 28.6 ± 3.0 | Pg | 26.0 - 32.0 |
| MCHC | 33.4 ± 0.9 | 33.4 ± 1.0 | 33.2 ± 1.0 | 33.3 ± 1.0 | g/dL | 30 - 36 |
| MCV | 87.8 ± 6.4 | 87.0 ± 7.9 | 86.8 ± 6.4 | 85.7 ± 7.8 | Fl | 79.0 - 98.0 |
| RDW CV | 13.6 ± 0.9 | 13.6 ± 1.2 | 13.5 ± 1.0 | 13.6 ± 1.2 | % | 11.0 - 16.0 |
| RDW SD | 43.0 ± 3.0 | 42.8 ± 3.4 | 42.5 ± 3.2 | 42.1 ± 3.3 | Fl | 38 - 43 |
| Platelets | 246.0 ± 51.1 | 236.8 ± 48.3 | 236.3 ± 50.0 | 235.1 ± 50.0 | K/μl | 150.0 - 400.0 |
| PDW* | 12.7 ± 2.8 | 12.4 ± 3.7 | 12.9 ± 1.9 | 13.0 ± 1.9 | % | 9.0 - 17.0 |
| MPV* | 10.5 ± 1.9 | 10.2 ± 2.8 | 10.6 ± 0.9 | 10.7 ± 0.8 | Μm | 6 - 11 |
| P-LCR* | 30.6 ± 8.8 | 30.2 ± 10.4 | 30.2 ± 7.3 | 30.5 ± 6.9 | % | 13.0 - 43.0 |

ǂ = IBH (Interbalkan Hospital) blood biomarker normal range, * = Paired data available for 190 PR and 193 NR individuals

Abbreviations: ALT alanine aminotransferase, ALP alkaline phosphatase, AST aspartate aminotransferase, CBC complete blood counts, CRP C-reactive protein, HbA1c hemoglobin A1c, HDL high-density lipoprotein, HOMA homeostasis model assessment, HOMA-B HOMA-beta-cell function, HOMA-IR HOMA-insulin resistance, LDL low-density lipoprotein, MCH mean corpuscular hemoglobin, MCHC mean corpuscular hemoglobin concentration, MCV mean corpuscular volume, MPV mean platelet volume, PDW platelet distribution width, P-LCR platelet-large cell ratio, RBC red blood cells, RDW CV red cell distribution width coefficient of variation, RDW SD red cell distribution width standard deviation, TSH thyroid-stimulating hormone, WBC white blood cells, γ-GT gamma-glutamyltransferase.

**Supplementary Table 4. Antibodies for lymphoid and myeloid panels used in flow cytometry** (excel file)

**Supplementary Table 5. Flow cytometry antibodies per gate** (excel file)

**Supplementary Table 6. Cytokine Panels**

| **Human Inflammation Panel 1** | **Human Anti-microbial Panel** |
| --- | --- |
| IL-1β | IL-1β |
| IL-6 | IL-6 |
| IL-8 | IL-8 |
| IL-10 | IL-10 |
| IL-12p70 | IL-12p70 |
| IL-17A | ΙFN-α2 |
| IL-18 | IFN-β |
| IL-23 | IFN-γ |
| IL-33 | IFN-λ1 |
| IFN-α2 | IFN-λ2/3 |
| IFN-γ | TNF-α |
| MCP-1 | IP-10 |
| TNF-α | GM-CSF |

**Supplementary Table 7. Defined categories for statistical adjustments at two time points a**

|  | **T1**  **(N = 411)** | | | **T2**  **(N = 390)** | | |
| --- | --- | --- | --- | --- | --- | --- |
|  | **PR**  **(N=200)** | **NR**  **(N=211)** | **Total (N=411)** | **PR**  **(N=192)** | **NR**  **(N=198)** | **Total (N=390)** |
| **Age Groups (%)** |  |  |  |  |  |  |
| 19-40 | 35 (17.5) | 82 (38.9) | 28.5 % | 34 (17.7) | 76 (38.4) | 28.2 % |
| 41-50 | 48 (24) | 43 (20.4) | 22.1 % | 45 (23.4) | 39 (19.7) | 21.5 % |
| 51-60 | 52 (26) | 55 (26) | 26% | 50 (26) | 53 (26.8) | 26.4% |
| 61-76 | 65 (32.5) | 31 (14.7) | 23.4% | 63 (32.8) | 30 (15.1) | 23.8 % |
| **BMI Groups (%)** |  |  |  |  |  |  |
| <18.5 | 1 (0.5) | 6 (2.8) | 1.7% | 1 (0.5) | 5 (2.5) | 1.5 % |
| 18.5-25 | 39 (19.5) | 77 (36.5) | 28.2% | 41 (21.4) | 65 (32.8) | 27.2 % |
| 25-30 | 99 (49.5) | 89 (42.2) | 45.7% | 91 (47.4) | 87 (43.9) | 45.6 % |
| ≥30 | 61 (30.5) | 39 (18.5) | 24.3% | 59 (30.7) | 41 (20.7) | 25.6 % |
| **Smoking Status (%)** |  |  |  |  |  |  |
| Non-smoker | 187 (93.5) | 141 (66.8) | 79.8 % | 179 (93.2) | 137 (69.2) | 81 % |
| Smoker | 13 (6.5) | 70 (33.2) | 20.2 % | 13 (6.8) | 61 (30.8) | 19 % |

a Categorical variables are expressed as %.

Abbreviations: BMI body mass index.

**Supplementary Table 8. FastBio participant medication use**

|  | **PR** | **NR** | **Total** |
| --- | --- | --- | --- |
| **Blood lipids** | 27 | 13 | 40 |
| **Blood glucose levels** | 7 | 2 | 9 |
| **Osteoporosis** | 6 | 3 | 9 |
| **Thyroid function** | 23 | 26 | 49 |
| **Blood pressure** | 36 | 17 | 53 |
| **Other** | 12 | 21 | 33 |

**Supplementary Table 9. Changes in anthropometric and blood pressure traits from T1 to T2**

|  | **PR group** | | | **NR group** | | |
| --- | --- | --- | --- | --- | --- | --- |
|  | **Estimate** | ***P*-value** | **95% CI** | **Estimate** | ***P*-value** | **95% CI** |
|
| Weight (kg) | -0.2 | 0.5 | -0.7, 0.4 | 1 | 0.0002**† | 0.5, 1.5 |
| BMI (kg/m²) | -0.02 | 0.5¥ | -0.07, 0.04 | 0.05 | 0.07 | -0.004, 0.002 |
| SBP (mmHg) | -1.9 | 0.06 | -3.9, 0.09 | -2.2 | 0.03*† | -4.2, -0.2 |
| DBP (mmHg) | -2.5 | 0.0002** | -3.7, -1.2 | -2.2 | 0.0006** | -3.5, -1.0 |

P-value: * ≤ 0.05, ** ≤ 0.001, *** ≤ 0.0001 T2 is reference time point.

† = not significant after Tukey’s correction

¥ = statistically significant after Tukey’s correction (β= -9.6e-16, p < 0.0001)

Abbreviations: BMI body mass index, SBP systolic blood pressure, DBP diastolic blood pressure.

**Supplementary Table 10. Differences in levels of blood biomarkers and HOMA indices between groups**

|  | **Between-group estimate**  **(T1)** | **Between-group estimate**  **(T2)** |
| --- | --- | --- |
| Total cholesterol (mmol/L) | 0.04 | -0.3*** |
| LDL cholesterol (mmol/L) | -0.001 | -0.3*** |
| HDL cholesterol (mmol/L) | 0.05 | -8.8e-3 |
| Triglycerides (mmol/L) | -1.3e-4 | 4.1e-4 |
| Glucose (mmol/L) | -2.1e-4 | 0.001 |
| Insulin (mU/L) | 0.008 | 0.04 |
| HbA1c (%) | -0.02 | 0.05 |
| Urea (mg/dL) | 0.7 | -4.9*** |
| Uric acid (mg/dL) | 0.1 | -0.1 |
| Creatinine (mg/dL) | -0.01 | -0.05** |
| AST (U/L) | 0.005 | -0.03 |
| ALT (U/L) | -0.01 | -0.07 |
| γ-GT (U/L) | -0.06 | -0.1*† |
| ALP (U/L) | 3.6*† | 5.9** |
| TSH (mIU/L) | 0.3*† | -0.2 |
| CRP (mg/L) | 0.2 | -0.6 |
| HOMA-B (--) | -3.4 | 12.4 |
| HOMA-IR (--) | -0.5 | -0.01 |

P-value: * ≤ 0.05, ** ≤ 0.001, *** ≤ 0.0001. Analyses adjusted for age, sex, BMI and medication use. T2 is reference time point.

† = not significant after Tukey’s correction

Abbreviations: ALT alanine aminotransferase, ALP alkaline phosphatase, AST aspartate aminotransferase, CRP C-reactive protein, HbA1c hemoglobin A1c, HDL high-density lipoprotein, HOMA homeostasis model assessment, HOMA-B HOMA-beta-cell function, HOMA-IR HOMA-insulin resistance, LDL low-density lipoprotein, TSH thyroid-stimulating hormone, γ-GT gamma-glutamyltransferase.

**Supplementary Table 11. Differences in complete blood count traits between groups**

| **CBC traits** | **Between-group estimate**  **(T1)** | **Between-group estimate**  **(T2)** |
| --- | --- | --- |
| WBC (K/μL) | -0.4*† | -0.4* |
| Lymphocytes (x10³/μl) | -0.04 | -0.06 |
| Lymphocyte % (%) | 1.1 | 1.0 |
| Eosinophils (x10³/μl) | -0.04* | -0.02 |
| Eosinophil % (%) | -0.5* | -0.3 |
| Monocytes (x10³/μl) | -0.03*† | -0.02 |
| Monocyte % (%) | -0.08 | 0.1 |
| Basophils (x10³/μl) | -9.7e-4 | -0.0006 |
| Basophil % (%) | -0.02 | 0.006 |
| Neutrophils (x10³/μl) | -0.3*† | -0.3* |
| Neutrophil % (%) | -0.5 | -0.9 |
| RBC (Μ/mL) | -0.02 | -0.08 |
| Hemoglobin (g/dL) | 0.05 | -0.1 |
| Hematocrit (%) | 0.1 | -0.3 |
| MCH (pg) | 0.2 | 0.2 |
| MCHC (g/dL) | 0.02 | -0.05 |
| MCV (fl) | 0.5 | 0.8 |
| RDW CV (%) | -0.2 | -0.1 |
| RDW SD (fl) | -0.2 | 0.04 |
| Platelets (K/μL) | 8.4 | 1.3 |
| PDW (%) | 0.3 | 0.3 |
| MPV (μm) | 0.2 | 0.2 |
| P-LCR (%) | 0.3 | 0.7 |

P-value: * ≤ 0.05, ** ≤ .001, *** ≤ 0.0001. Analyses adjusted for age, sex, BMI and medication use. PR is reference group.

† = not significant after Tukey’s correction

Abbreviations: MCH mean corpuscular hemoglobin, MCHC mean corpuscular hemoglobin concentration, MCV mean corpuscular volume, MPV mean platelet volume, PDW platelet distribution width, P-LCR platelet-large cell ratio, RBC red blood cells, RDW CV red cell distribution width coefficient of variation, RDW SD red cell distribution width standard deviation, WBC white blood cells.

**Supplementary Table 12. Differences in anthropometric and blood pressure traits between groups**

P-value**:** * ≤ 0.05, ** ≤ 0.001, *** ≤ 0.0001 T2 is reference time point.

† = not significant after Tukey’s correction

Abbreviations: BMI body mass index, SBP systolic blood pressure, DBP diastolic blood pressure.

|  | **Between-group estimate**  **(T1)** | **Between-group estimate**  **(T2)** |
| --- | --- | --- |
| Weight (kg) | 2.1 | 1.04 |
| BMI (kg/m²) | 0.2*† | 0.1 |
| SBP (mmHg) | 0.4 | -0.8 |
| DBP (mmHg) | 0.02 | -1.04 |

**Supplementary Table 13. Significance of cytokine response to stimulation with LPS, R848, and PHA**

| **LPS stimulation** | **PR Group** *P*-value | **NR Group** *P*-value |
| --- | --- | --- |
| IL-8 | 0.00029** | 0.0008** |
| MCP-1 | 0.0024** | 0.0292* |
| TNF-α | 0.0024** | 0.0093** |
| IL-12p70 | 0.0528 | 0.8839 |
| **R848 stimulation** |  | |
| IL-8 | 0.0181* | 0.000005** |
| MCP-1 | 0.0003** | 0.0333* |
| TNF-α | 0.0344* | 0.0076** |
| IL-12p70 | 0.0552 | 0.5959 |
| **PHA stimulation** |  | |
| IL-10 | 0.00049** | 0.2564 |
| IL-17A | 0.6296 | 0.0081** |

P-value: * ≤ 0.05, ** ≤ 0.01
Abbreviations: LPS lipopolysaccharide, R848 resiquimod, PHA phytohemagglutinin

**Supplementary Figures**

**
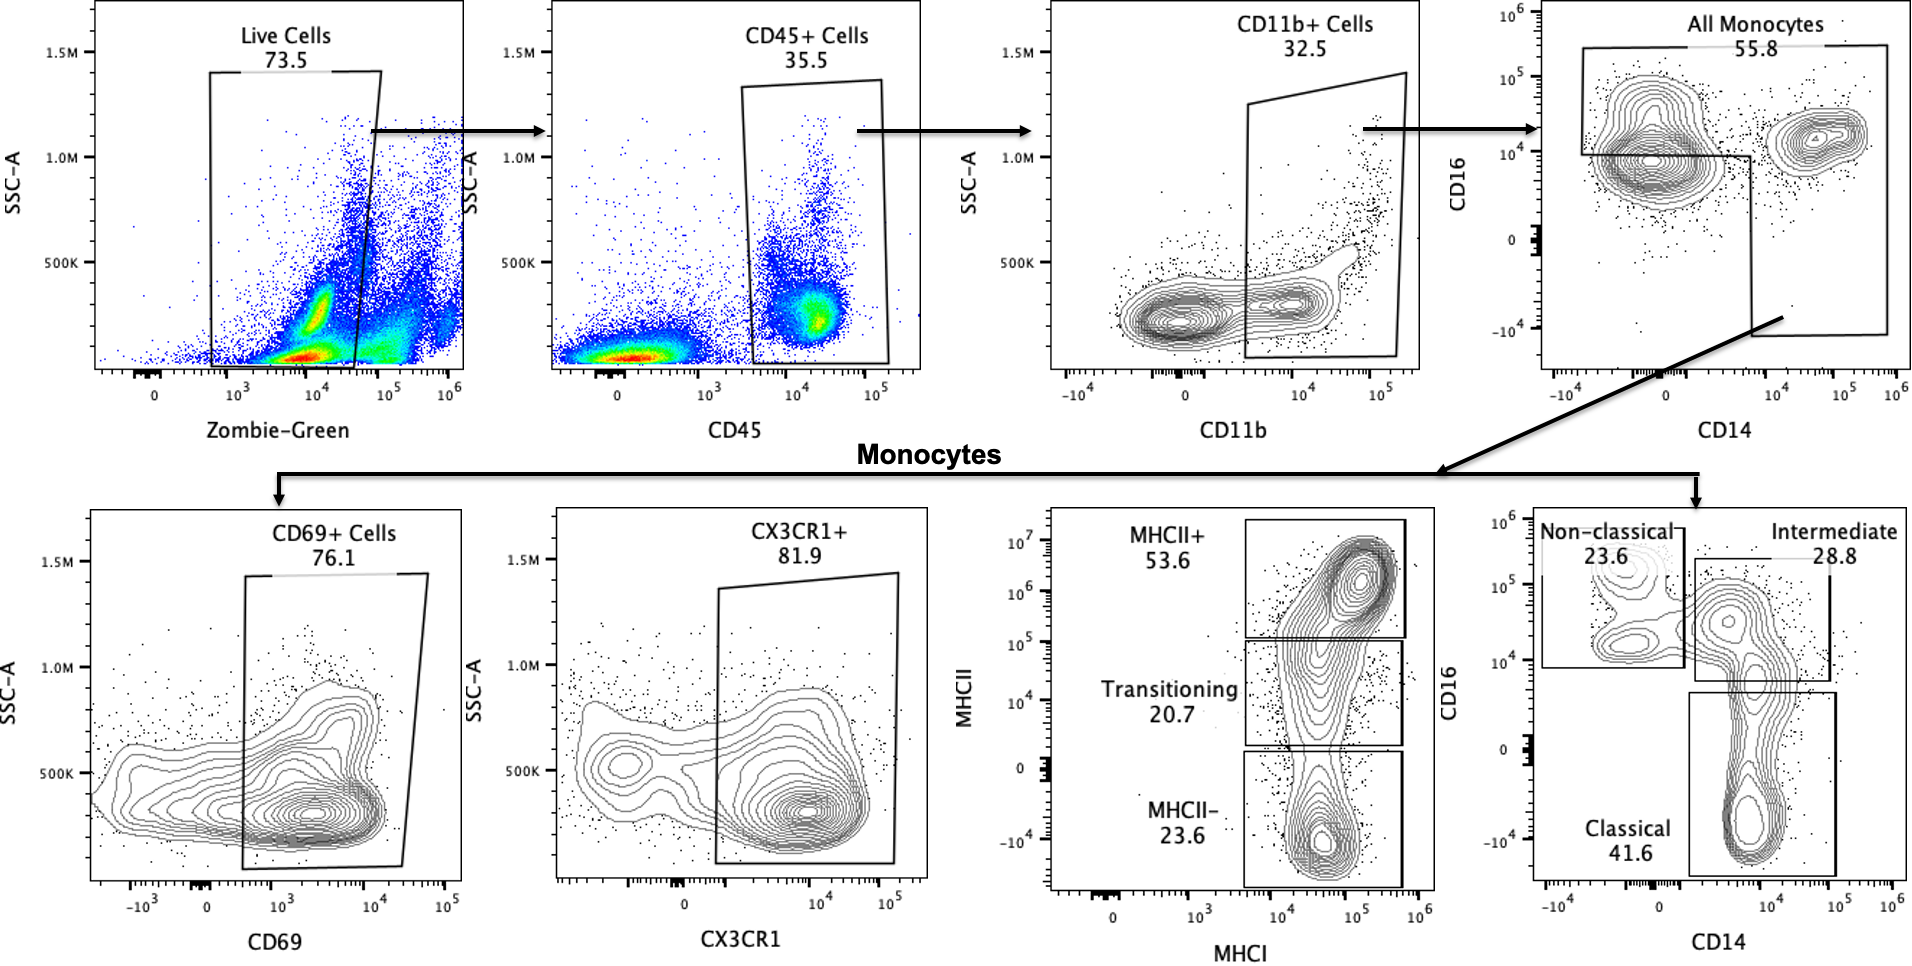
**

**Supplementary Figure 1. Myeloid panel gating strategy.**

**
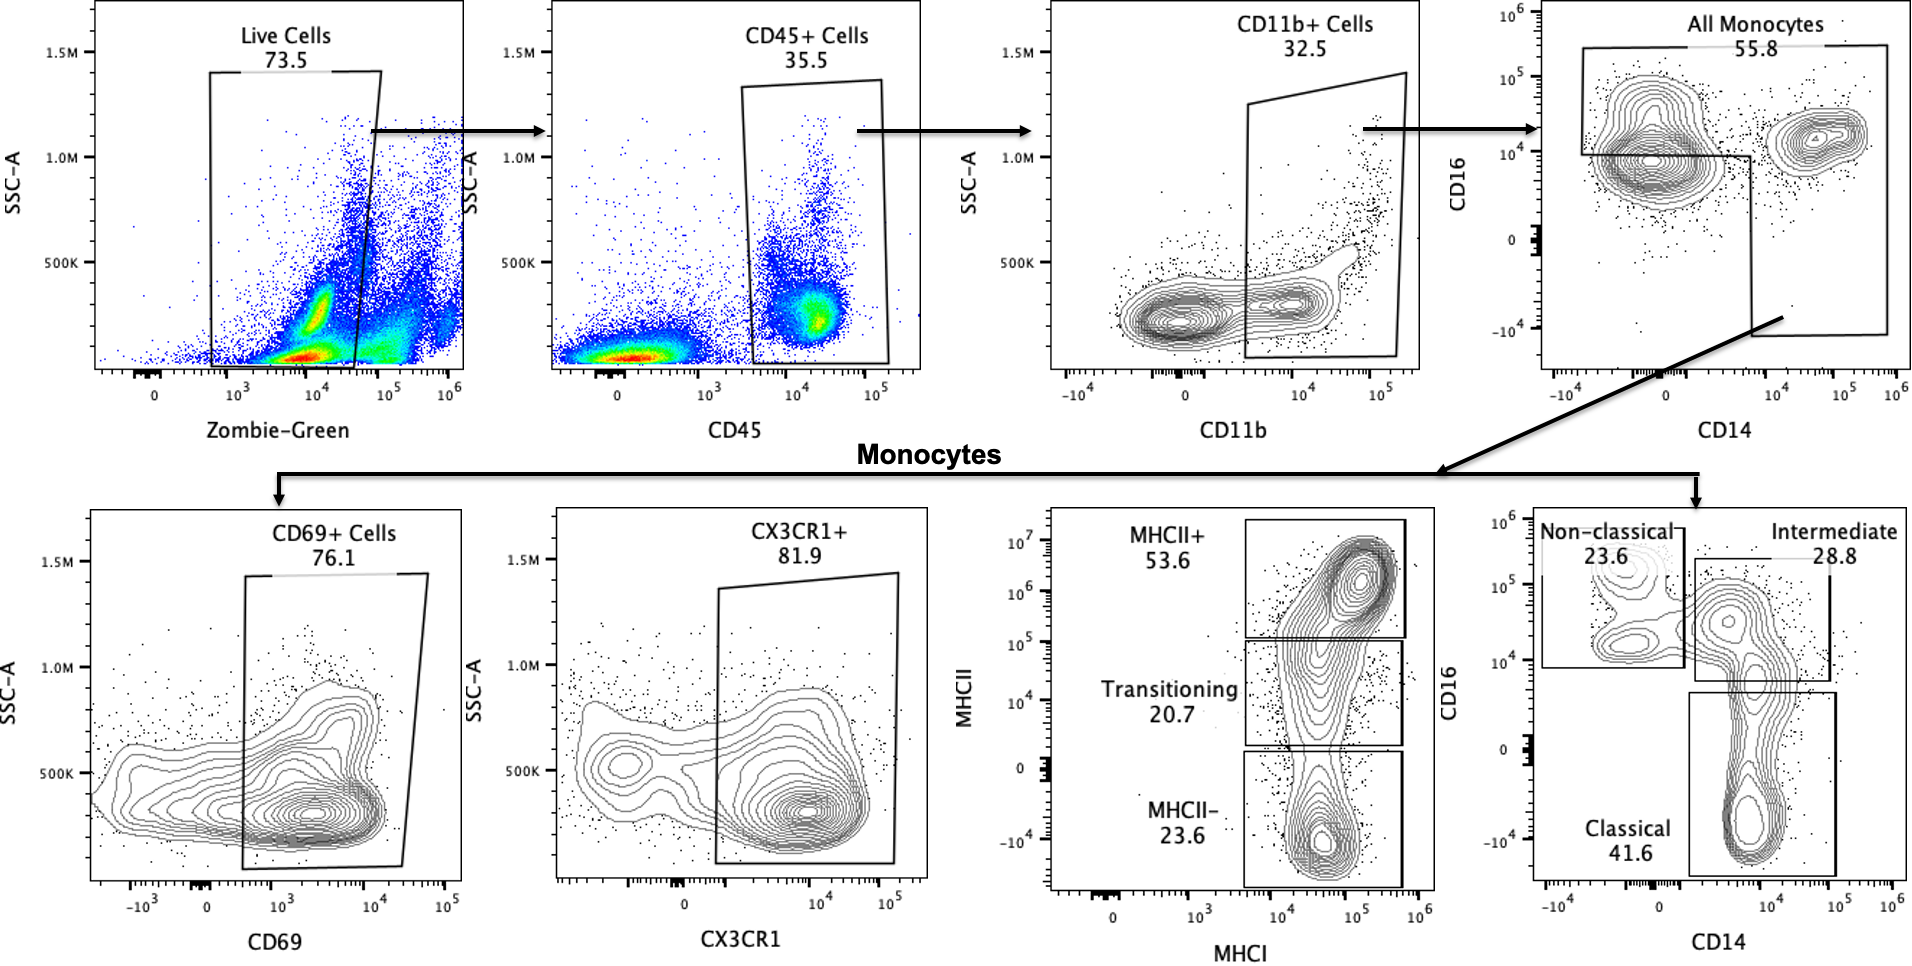
**

**Supplementary Figure 2. Lymphoid panel gating strategy.**

**Supplementary References**

1 Yoo, T. K., Oh, B. K., Lee, M. Y. & Sung, K. C. Association between physical activity and insulin resistance using the homeostatic model assessment for insulin resistance independent of waist circumference. *Sci Rep* **12**, 6002, doi:10.1038/s41598-022-10032-2 (2022).

2 Ito, R. *et al.* Teneligliptin, a Dipeptidyl Peptidase-4 Inhibitor, Improves Early-Phase Insulin Secretion in Drug-Naive Patients with Type 2 Diabetes. *Drugs R D* **15**, 245-251, doi:10.1007/s40268-015-0096-6 (2015).

3 Geifman, N., Cohen, R. & Rubin, E. Redefining meaningful age groups in the context of disease. *Age (Dordr)* **35**, 2357-2366, doi:10.1007/s11357-013-9510-6 (2013).

4 Franssen, T., Stijnen, M., Hamers, F. & Schneider, F. Age differences in demographic, social and health-related factors associated with loneliness across the adult life span (19–65 years): a cross-sectional study in the Netherlands. *BMC Public Health* **20**, 1118, doi:10.1186/s12889-020-09208-0 (2020).

5 Swift, H. J., Abrams, D., Drury, L. & Lamont, R. A. in *Encyclopedia of Evolutionary Psychological Science* (eds Todd K. Shackelford & Viviana A. Weekes-Shackelford) 1-10 (Springer International Publishing, 2018).

6 Stenholm, S. *et al.* Body mass index as a predictor of healthy and disease-free life expectancy between ages 50 and 75: a multicohort study. *International Journal of Obesity* **41**, 769-775, doi:10.1038/ijo.2017.29 (2017).

7 Primatesta, P., Falaschetti, E., Gupta, S., Marmot, M. G. & Poulter, N. R. Association between smoking and blood pressure: evidence from the health survey for England. *Hypertension* **37**, 187-193, doi:10.1161/01.hyp.37.2.187 (2001).
